# Supplementary material for: An evolutionary perspective on zinc uptake by human fungal pathogens
Source: Royal Society of Chemistry journal article supplement (doi:10.1039/c4mt00331d), 2015-01-01
Supplement: c4mt00331d1.pdf [file c4mt00331d1.pdf]

Supplementary Figure S1. Alignment of amino acid sequences of *A. fumigatus* zinc importers, ZrfA, ZrfB, ZrfC and ZrfD.

|                              |                                                             |              |               |                                 |
|------------------------------|-------------------------------------------------------------|--------------|---------------|---------------------------------|
|                              | 1                                                           | 10           | 20            | 30                              |
| Afu6g00470_A._fumigatus_ZrfD | .....                                                       | MNCPSRTDDTL  | LHCDWNQNPFL   | APDLTTRQDFNGI                   |
| Afu2g03860_A._fumigatus_ZrfB | .....                                                       | .....        | .....         | .....                           |
| Afu1g01550_A._fumigatus_ZrfA | .....                                                       | .....        | .....         | .....                           |
| Afu4g09560_A._fumigatus_ZrfC | MAKALLLLS                                                   | LLGGLGLAHAQ  | YVVTYTGCHN    | EGSTEYCFGPDGKETFPFPTTESASRTVPVT |
|                              | 40                                                          | 50           | 60            | 70                              |
| Afu6g00470_A._fumigatus_ZrfD | TNARVYRSGPGLDAVSSTSWEDSQAMPEQRDTPIGSKSDLRGASLTP             | .....        | SVDKVKSWAW    |                                 |
| Afu2g03860_A._fumigatus_ZrfB | .....                                                       | .....        | .....         | .....                           |
| Afu1g01550_A._fumigatus_ZrfA | .....                                                       | .....        | .....         | .....                           |
| Afu4g09560_A._fumigatus_ZrfC | VAAAAAATTSSADASAVTGCHSHGSDVFCIDGDGNEVQVILPSTPTGELPAQYTGCHSH |              |               |                                 |
|                              | 100                                                         | 110          | 120           | 130                             |
| Afu6g00470_A._fumigatus_ZrfD | WLLSVLFTSALISHESLGRYFGSTIS                                  | SVSDT        | TAVKPEANLIKRS | TCVAGG                          |
| Afu2g03860_A._fumigatus_ZrfB | .....                                                       | .....        | .....         | .....                           |
| Afu1g01550_A._fumigatus_ZrfA | .....                                                       | .....        | .....         | .....                           |
| Afu4g09560_A._fumigatus_ZrfC | GSETFCMDPEGNDVQIVGEEGSTEG                                   | SSSG         | SSGESQSG      | SKEGMNCFHAGVERHCIGAGES          |
|                              | 150                                                         | 160          | 170           | 180                             |
| Afu6g00470_A._fumigatus_ZrfD | .....                                                       | V.KSS        | EYNTSLH       | GALSII                          |
| Afu2g03860_A._fumigatus_ZrfB | .....                                                       | .....        | .....         | .....                           |
| Afu1g01550_A._fumigatus_ZrfA | .....                                                       | .....        | .....         | .....                           |
| Afu4g09560_A._fumigatus_ZrfC | ESGSSQKSCGLRTR                                              | DYD          | VFLR          | GTLEVVIVTSSI                    |
|                              | 200                                                         | 210          | 220           | 230                             |
| Afu6g00470_A._fumigatus_ZrfD | FCTGVLIATAFVHL                                              | PFTA         | FTSLNNP       | CLSGF                           |
| Afu2g03860_A._fumigatus_ZrfB | .....                                                       | .....        | .....         | .....                           |
| Afu1g01550_A._fumigatus_ZrfA | .....                                                       | .....        | .....         | .....                           |
| Afu4g09560_A._fumigatus_ZrfC | FCTGVILSTAFVHL                                              | YTH          | NLMFTNE       | CLCELEYEA                       |
|                              | 260                                                         | 270          | 280           | 290                             |
| Afu6g00470_A._fumigatus_ZrfD | PARHVCRRGGLKVSEQETSLSESGVCNSHVF                             | VARD         | S.KTRDE       | VKR                             |
| Afu2g03860_A._fumigatus_ZrfB | YARFGHG                                                     | .....        | HLDD          | LGHDD                           |
| Afu1g01550_A._fumigatus_ZrfA | YVEWKYS                                                     | .....        | VPREANATAT    | ITQ                             |
| Afu4g09560_A._fumigatus_ZrfC | RA                                                          | TRCAS        | .....         | PCPEQTGDMSP                     |
|                              | 310                                                         | 320          | 330           | 340                             |
| Afu6g00470_A._fumigatus_ZrfD | GPLVGRQTSVSRTINRMGEEDCRIMRIASAP                             | EGMRPVQESKAP | PI            | EDVERSDDLATP                    |
| Afu2g03860_A._fumigatus_ZrfB | DHLG                                                        | .....        | .....         | HSR                             |
| Afu1g01550_A._fumigatus_ZrfA | EPSS                                                        | .....        | .....         | PTC                             |
| Afu4g09560_A._fumigatus_ZrfC | .....                                                       | .....        | .....         | QQQ                             |
|                              | 370                                                         | 380          | 390           | 400                             |
| Afu6g00470_A._fumigatus_ZrfD | KHKKA                                                       | VMOVF        | LIE           | MCILFHSVF                       |
| Afu2g03860_A._fumigatus_ZrfB | EYSAQ                                                       | LT           | SVF           | LLE                             |
| Afu1g01550_A._fumigatus_ZrfA | AFRQD                                                       | IAAFL        | VLE           | PIIFHSVF                        |
| Afu4g09560_A._fumigatus_ZrfC | TNPNT                                                       | KLSV         | LVME          | AGVVFHS                         |
|                              | 430                                                         | 440          | 450           | 460                             |
| Afu6g00470_A._fumigatus_ZrfD | DWF                                                         | E            | RAV           | QPLWLS                          |
| Afu2g03860_A._fumigatus_ZrfB | PWPN                                                        | SKRF         | TPYLL         | GFAYGLS                         |
| Afu1g01550_A._fumigatus_ZrfA | HFG                                                         | RRRWLP       | WIL           | CLAYGLT                         |
| Afu4g09560_A._fumigatus_ZrfC | P                                                           | GF           | ..            | LLG                             |
|                              | 490                                                         | 500          | 510           | 520                             |
| Afu6g00470_A._fumigatus_ZrfD | S                                                           | VELMSEDFLS   | DESW          | RVLGRKRVIA                      |
| Afu2g03860_A._fumigatus_ZrfB | A                                                           | VELMAHEFMF   | SPSMRKAPIR    | TVLAAF                          |
| Afu1g01550_A._fumigatus_ZrfA | G                                                           | VELLARDFL    | FDP           | CR                              |
| Afu4g09560_A._fumigatus_ZrfC | G                                                           | VDMMWARDVVM  | DG            | GEMMNARL                        |

Figure S2. Alignment of *C. albicans* Pra1 and *A. fumigatus* AspF2.

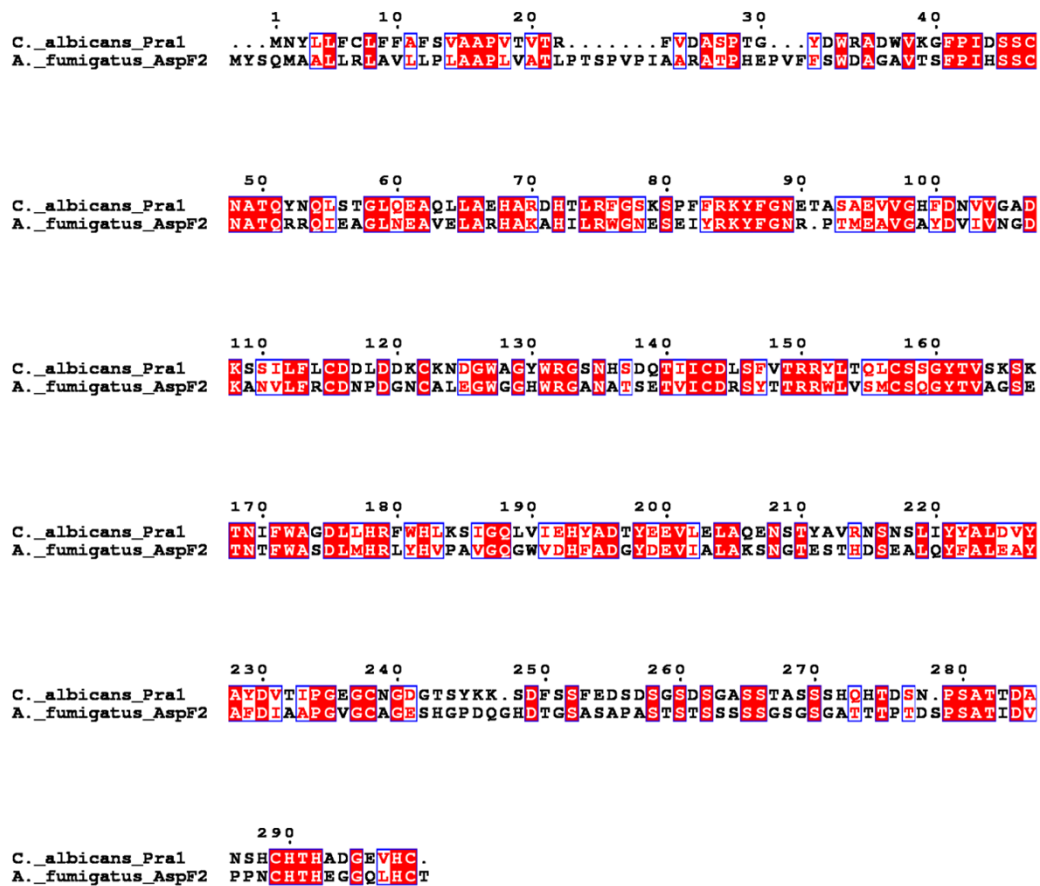

For both figures, sequences were aligned using ClustalW ([www.ebi.ac.uk/Tools/msa/clustalw2/](http://www.ebi.ac.uk/Tools/msa/clustalw2/)) and rendered using ESPrift [1].

1. Robert X, Gouet P (2014) Deciphering key features in protein structures with the new ENDscript server. *Nucleic Acids Res* 42: W320-324.
